# Supplementary material
Source: PubMed Central journal article supplement (PMC3388103)
Supplement: NIHMS348446-supplement-1.pdf [file NIHMS348446-supplement-1.pdf]

25 December, 2011

This document includes signatures by the authors of the Imai et al manuscript entitled “Experimental adaptation of an influenza H5 haemagglutinin (HA) confers respiratory droplet transmission to a reassortant H5 HA/H1N1 virus in ferrets” indicating their agreement to the removal of one of the authors, Douglas A. Holtzman.

**Author list**

Masaki Imai  
Tokiko Watanabe  
Masato Hatta  
Subash C. Das  
Makoto Ozawa  
Kyoko Shinya  
Gongxun Zhong  
Anthony Hanson  
Hiroaki Katsura  
Shinji Watanabe  
Chengjun Li  
Eiryu Kawakami  
Shinya Yamada  
Maki Kiso  
Yasuo Suzuki  
Eileen A. Maher  
Gabriele Neumann  
Yoshihiro Kawaoka

Change of Authors on Imai et al manuscript

I agree to the removal of one of the authors, Douglas A. Holtzman, from the authors listed for the Imai et al manuscript entitled "Experimental adaptation of an influenza H5 haemagglutinin (HA) confers respiratory droplet transmission to a reassortant H5 HA/H1N1 virus in ferrets".

Masaki Imai

Name

Masaki Imai

Signature

12-26-2011

Date

Change of Authors on Imai et al manuscript

I agree to the removal of one of the authors, Douglas A. Holtzman, from the authors listed for the Imai et al manuscript entitled "Experimental adaptation of an influenza H5 haemagglutinin (HA) confers respiratory droplet transmission to a reassortant H5 HA/H1N1 virus in ferrets".

Tokiko Watanabe

Name

Ti Watanabe

Signature

Dec-24-2011

Date

Change of Authors on Imai et al manuscript

I agree to the removal of one of the authors, Douglas A. Holtzman, from the authors listed for the Imai et al manuscript entitled "Experimental adaptation of an influenza H5 haemagglutinin (HA) confers respiratory droplet transmission to a reassortant H5 HA/H1N1 virus in ferrets".

Masato Hatta

Name

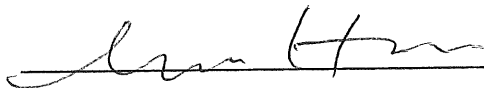

Signature

12/24/11

Date

Change of Authors on Imai et al manuscript

I agree to the removal of one of the authors, Douglas A. Holtzman, from the authors listed for the Imai et al manuscript entitled "Experimental adaptation of an influenza H5 haemagglutinin (HA) confers respiratory droplet transmission to a reassortant H5 HA/H1N1 virus in ferrets".

SUBASH C DAS

Name

Subarn Chandra Das

Signature

12/23/2011

Date

Change of Authors on Imai et al manuscript

I agree to the removal of one of the authors, Douglas A. Holtzman, from the authors listed for the Imai et al manuscript entitled "Experimental adaptation of an influenza H5 haemagglutinin (HA) confers respiratory droplet transmission to a reassortant H5 HA/H1N1 virus in ferrets".

Makoto Ozawa

Name

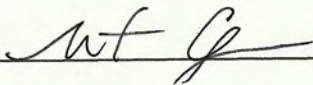

Signature

12/23/11

Date

Change of Authors on Imai et al manuscript

I agree to the removal of one of the authors, Douglas A. Holtzman, from the authors listed for the Imai et al manuscript entitled "Experimental adaptation of an influenza H5 haemagglutinin (HA) confers respiratory droplet transmission to a reassortant H5 HA/H1N1 virus in ferrets".

\_\_\_\_\_  
Kyoko Shinya

Name



\_\_\_\_\_  
Signature

\_\_\_\_\_  
Dec. 24, 2011

Date

Change of Authors on Imai et al manuscript

I agree to the removal of one of the authors, Douglas A. Holtzman, from the authors listed for the Imai et al manuscript entitled "Experimental adaptation of an influenza H5 haemagglutinin (HA) confers respiratory droplet transmission to a reassortant H5 HA/H1N1 virus in ferrets".

Gongxun Zhong

Name

Gongxun Zhong

Signature

12/24/2011

Date



Change of Authors on Imai et al manuscript

I agree to the removal of one of the authors, Douglas A. Holtzman, from the authors listed for the Imai et al manuscript entitled "Experimental adaptation of an influenza H5 haemagglutinin (HA) confers respiratory droplet transmission to a reassortant H5 HA/H1N1 virus in ferrets".

Anthony Hanson

Name

Anthony Hanson

Signature

12/23/11

Date

Change of Authors on Imai et al manuscript

I agree to the removal of one of the authors, Douglas A. Holtzman, from the authors listed for the Imai et al manuscript entitled "Experimental adaptation of an influenza H5 haemagglutinin (HA) confers respiratory droplet transmission to a reassortant H5 HA/H1N1 virus in ferrets".

Hiroaki Katsura

Name

Hiroaki Katsura

Signature

Dec-24-2011

Date

Change of Authors on Imai et al manuscript

I agree to the removal of one of the authors, Douglas A. Holtzman, from the authors listed for the Imai et al manuscript entitled "Experimental adaptation of an influenza H5 haemagglutinin (HA) confers respiratory droplet transmission to a reassortant H5 HA/H1N1 virus in ferrets".

Shinji Watanabe

Name

Shinji Watanabe

Signature

12-24-2011

Date

Change of Authors on Imai et al manuscript

I agree to the removal of one of the authors, Douglas A. Holtzman, from the authors listed for the Imai et al manuscript entitled "Experimental adaptation of an influenza H5 haemagglutinin (HA) confers respiratory droplet transmission to a reassortant H5 HA/H1N1 virus in ferrets".

Chengjun Li

Name

Chengjun Li

Signature

12/24/2011

Date

Change of Authors on Imai et al manuscript

I agree to the removal of one of the authors, Douglas A. Holtzman, from the authors listed for the Imai et al manuscript entitled "Experimental adaptation of an influenza H5 haemagglutinin (HA) confers respiratory droplet transmission to a reassortant H5 HA/H1N1 virus in ferrets".

Eiryō Kawakami

Name

Eiryō Kawakami

Signature

Dec-24-2011

Date

Change of Authors on Imai et al manuscript

I agree to the removal of one of the authors, Douglas A. Holtzman, from the authors listed for the Imai et al manuscript entitled "Experimental adaptation of an influenza H5 haemagglutinin (HA) confers respiratory droplet transmission to a reassortant H5 HA/H1N1 virus in ferrets".

SHINYA YAMADA

Name

Shinya Yamada

Signature

26th Dec. 2011

Date

Change of Authors on Imai et al manuscript

I agree to the removal of one of the authors, Douglas A. Holtzman, from the authors listed for the Imai et al manuscript entitled "Experimental adaptation of an influenza H5 haemagglutinin (HA) confers respiratory droplet transmission to a reassortant H5 HA/H1N1 virus in ferrets".

Maki Kiso

Name

Maki Kiso

Signature

12/24/2011

Date

Change of Authors on Imai et al manuscript

I agree to the removal of one of the authors, Douglas A. Holtzman, from the authors listed for the Imai et al manuscript entitled "Experimental adaptation of an influenza H5 haemagglutinin (HA) confers respiratory droplet transmission to a reassortant H5 HA/H1N1 virus in ferrets".

YASUO SUZUKI

Name

Yasuo Suzuki

Signature

Dec. 24, 2011

Date



Change of Authors on Imai et al manuscript

I agree to the removal of one of the authors, Douglas A. Holtzman, from the authors listed for the Imai et al manuscript entitled "Experimental adaptation of an influenza H5 haemagglutinin (HA) confers respiratory droplet transmission to a reassortant H5 HA/H1N1 virus in ferrets".

Eileen A. Maher

---

Name

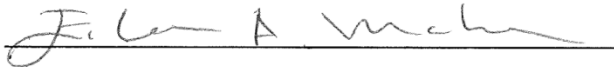

---

Signature

12-23-2011

---

Date

Change of Authors on Imai et al manuscript

I agree to the removal of one of the authors, Douglas A. Holtzman, from the authors listed for the Imai et al manuscript entitled "Experimental adaptation of an influenza H5 haemagglutinin (HA) confers respiratory droplet transmission to a reassortant H5 HA/H1N1 virus in ferrets".

Gabriele Neumann

---

Name



---

Signature

12-24-11

---

Date

Change of Authors on Imai et al manuscript

I agree to the removal of one of the authors, Douglas A. Holtzman, from the authors listed for the Imai et al manuscript entitled "Experimental adaptation of an influenza H5 haemagglutinin (HA) confers respiratory droplet transmission to a reassortant H5 HA/H1N1 virus in ferrets".

Yoshihiro Kawaoka

---

Name



---

Signature

12-23-2011

---

Date
